# Supplementary material
Source: PubMed Central journal article supplement (PMC3848412)
Supplement: CJN.12181212_CJN12181212SupplementaryData.pdf [file CJN.12181212_CJN12181212SupplementaryData.pdf]

## **SUPPLEMENTARY TABLES**

**Supplementary Table 1. Stages of susceptibility definition (26)**

| Stages | Susceptibility                        |                                                                             |
|--------|---------------------------------------|-----------------------------------------------------------------------------|
| I      | None                                  | Baseline GFR > 90 mL/min/1.73 m <sup>2</sup>                                |
| II     | Pre-existing CKD stage 2 <sup>a</sup> | Baseline GFR 60 to 89 mL/min/1.73 m <sup>2</sup>                            |
| III    | Pre-existing CKD stages ≥3            | Baseline GFR < 60 mL/min/1.73 m <sup>2</sup>                                |
| IV     | Pre-existing CKD stages 2 or ≥3       | Baseline GFR < 89 mL/min/1.73 m <sup>2</sup> + one risk factor <sup>b</sup> |

CKD: chronic kidney disease, GFR: glomerular filtration rate; <sup>a</sup> K/DOQI clinical practice guidelines for CKD (49); <sup>b</sup> Risk factors include diabetes mellitus with microalbuminuria, multiple myeloma, congestive heart failure and decompensated cirrhosis.

**Supplementary Table 2. Serum creatinine values in patients excluded from the study.**

| <b>SCr (mg/dL)</b>        | <b>&lt;1.0</b> | <b>1.0-1.5</b> | <b>1.5-2.0</b> | <b>2.1 to 3.0</b> | <b>&gt;3.0</b> | <b>Total</b> |
|---------------------------|----------------|----------------|----------------|-------------------|----------------|--------------|
| <b>Nº of patients (%)</b> | 2024 (51)      | 877 (22)       | 318 (8)        | 304 (8)           | 419 (11)       | 3942         |
| <b>Mean SCr</b>           | 0.73           | 1.26           | 1.77           | 2.48              | 5.41           | 1.59         |

Serum creatinine (SCr) values for patients who were admitted from the Emergency Department between March and November 2008, but did not meet study entry criteria or declined to consent.

**Supplementary Table 3. Stages of Susceptibility for all patients according to clinical classification**

| Susceptibility | All Patients (%)* | Clinical Classification (%)** |                    |                   |                   |
|----------------|-------------------|-------------------------------|--------------------|-------------------|-------------------|
|                | <b>616</b>        | <b>AKI<br/>130</b>            | <b>TAz<br/>159</b> | <b>CKD<br/>15</b> | <b>NF<br/>312</b> |
| <b>I</b>       | 414 (67.2)        | 48 (11.6)                     | 111 (26.8)         | 0 (0.0)           | 255 (61.6)        |
| <b>II</b>      | 132 (21.4)        | 38 (28.8)                     | 39 (29.5)          | 3 (2.3)           | 52 (39.4)         |
| <b>III</b>     | 30 (4.9)          | 19 (63.3)                     | 4 (13.3)           | 7 (23.3)          | 0 (0.0)           |
| <b>IV</b>      | 40 (6.5)          | 25 (62.5)                     | 5 (12.5)           | 5 (12.5)          | 5 (12.5)          |

\* (%) within total number of patients; \*\* (%) within susceptibility stages. AKI: acute kidney injury, TAz: transient azotemia, sCKD: stable chronic kidney disease, NF: normal function.

#### Supplementary Table 4. Main Diagnosis on hospital discharge

| Diagnostic Group                                      | Number of cases (%) |
|-------------------------------------------------------|---------------------|
| Surgical Case                                         | 10 (1.6)            |
| Gastrointestinal                                      | 86 (13.9)           |
| Cardiovascular                                        | 126 (20.4)          |
| Respiratory                                           | 59 (9.58)           |
| Nephrologic                                           | 40 (6.49)           |
| Haematologic                                          | 14 (2.27)           |
| Neurologic                                            | 106 (17.21)         |
| Neoplastic                                            | 29 (4.71)           |
| Metabolic                                             | 24 (3.90)           |
| Intoxication/substance abuse                          | 13 (2.11)           |
| Severe sepsis/ septic shock                           | 87 (14.12)          |
| Musculoskeletal system and connective tissue diseases | 6 (0.97)            |
| Other infections                                      | 19 (3.08)           |
| Others                                                | 5 (0.81)            |

The definition of the diagnostic groups was adapted from the Clinical Modification of the International Classification of Diseases 10<sup>th</sup> edition (ICD-10-CM). The group “other infections” includes infections not affecting organs or systems mentioned in other diagnostic groups. The remaining diagnosis, that could not be included in any of the other categories like psychiatric diseases, were classified as “Others”.
